# Supplementary material for: Mortality, Morbidity, and Developmental Outcomes in Infants Born to Women Who Received Either Mefloquine or Sulfadoxine-Pyrimethamine as Intermittent Preventive Treatment of Malaria in Pregnancy: A Cohort Study
Source: PLOS journal article supplement (doi:10.1371/journal.pmed.1001964), 2016-02-23
Supplement: S2 (10.1371/journal.pmed.1001964.s002) [file journal.pmed.1001964.s002]

**Table S2. Serious adverse events of children by system organ class and by their mother's study group**

| Serious adverse event by system organ class (SOC) | MQ <sup>1</sup> (N=2815) |     | SP <sup>2</sup> (N=1432) |     |
|---------------------------------------------------|--------------------------|-----|--------------------------|-----|
|                                                   | %                        | n   | %                        | n   |
| Infectious diseases                               | 7.2                      | 202 | 7.6                      | 109 |
| Non cause-specific disorders                      | 1.5                      | 41  | 1.5                      | 21  |
| Respiratory diseases                              | 1.1                      | 31  | 1.0                      | 14  |
| Congenital abnormalities                          | 0.8                      | 23  | 1.0                      | 14  |
| Blood disorders                                   | 0.4                      | 11  | 0.2                      | 3   |
| Perinatal complications                           | 0.5                      | 13  | 0.9                      | 13  |
| Metabolism and nutrition disorders                | 0.2                      | 5   | 0.0                      | 0   |
| Neurological diseases                             | 0.1                      | 4   | 0.3                      | 4   |
| Endocrine disorders                               | 0.0                      | 1   | 0.0                      | 0   |
| Eye disorders                                     | 0.0                      | 1   | 0.0                      | 0   |
| Gastrointestinal disorders                        | 0.2                      | 7   | 0.2                      | 3   |
| Investigations                                    | 0.1                      | 3   | 0.1                      | 2   |
| Injury, poisoning and procedural complications    | 0.0                      | 1   | 0.0                      | 0   |
| Renal and urinary diseases                        | 0.0                      | 0   | 0.1                      | 1   |

<sup>1</sup> mefloquine <sup>2</sup> suphadoxine-pyrimethamine
