# Supplementary material for: Mortality, Morbidity, and Developmental Outcomes in Infants Born to Women Who Received Either Mefloquine or Sulfadoxine-Pyrimethamine as Intermittent Preventive Treatment of Malaria in Pregnancy: A Cohort Study
Source: PLOS journal article supplement (doi:10.1371/journal.pmed.1001964), 2016-02-23
Supplement: S4 (10.1371/journal.pmed.1001964.s004) [file journal.pmed.1001964.s004]

**Table S4. Infant causes of death by System Organ Class and by their mother's study group.**

| System Organ Class           | IPTp <sup>1</sup>       |      |                        |      | Total |       |
|------------------------------|-------------------------|------|------------------------|------|-------|-------|
|                              | MQ <sup>2</sup> (N=103) |      | SP <sup>3</sup> (N=54) |      | n     | %     |
|                              | n                       | %    | n                      | %    |       |       |
| Non cause-specific disorders | 30                      | 29.1 | 15                     | 27.8 | 45    | 28.7  |
| Infectious diseases          | 28                      | 27.2 | 12                     | 22.2 | 40    | 25.5  |
| Respiratory diseases         | 23                      | 22.3 | 10                     | 18.5 | 33    | 21.0  |
| Perinatal complications      | 7                       | 6.8  | 7                      | 13.0 | 14    | 8.9   |
| Blood disorders              | 8                       | 7.8  | 1                      | 1.8  | 9     | 5.7   |
| Congenital abnormalities     | 3                       | 2.9  | 5                      | 9.3  | 8     | 5.1   |
| Neurological diseases        | 2                       | 1.9  | 3                      | 5.6  | 5     | 3.2   |
| Renal and urinary diseases   | 0                       | 0.0  | 1                      | 1.9  | 1     | 0.6   |
| Endocrine disorders          | 1                       | 1.0  | 0                      | 0.0  | 1     | 0.6   |
| Gastrointestinal disorders   | 1                       | 1.0  | 0                      | 0.0  | 1     | 0.6   |
| Total                        | 103                     | 65.6 | 54                     | 34.4 | 157   | 100.0 |

<sup>1</sup>Intermittent preventive treatment of malaria in pregnancy <sup>2</sup>mefloquine <sup>3</sup>sulphadoxine-pyrimethamine
