# Supplementary material for: Mortality, Morbidity, and Developmental Outcomes in Infants Born to Women Who Received Either Mefloquine or Sulfadoxine-Pyrimethamine as Intermittent Preventive Treatment of Malaria in Pregnancy: A Cohort Study
Source: PLOS journal article supplement (doi:10.1371/journal.pmed.1001964), 2016-02-23
Supplement: S5 (10.1371/journal.pmed.1001964.s005) [file journal.pmed.1001964.s005]

**Table S5. Comparison of baseline characteristics at delivery of children who completed the study and children who did not complete the study (excluding deaths).**

| Baseline characteristics                            |            | Children who completed study (N=3109) | Children who did not complete the study , excluding deaths (N=972) | P-value |
|-----------------------------------------------------|------------|---------------------------------------|--------------------------------------------------------------------|---------|
|                                                     |            | n (%)                                 | n (%)                                                              |         |
| Live births by country (n (%))                      | Benin      | 875 (28.1)                            | 162 (16.7)                                                         | <0.001  |
|                                                     | Gabon      | 632 (20.3)                            | 334 (34.4)                                                         |         |
|                                                     | Mozambique | 890 (28.6)                            | 189 (19.4)                                                         |         |
|                                                     | Tanzania   | 712 (22.9)                            | 287 (29.5)                                                         |         |
| Mothers IPTp group MQ <sup>1,2</sup>                |            | 2054 (66.1)                           | 654 (67.3)                                                         | 0.483   |
| Males                                               |            | 1551 (49.9)                           | 481 (49.5)                                                         | 0.794   |
| Weight (g, mean (sd) )                              |            | 3040.51(466.9)                        | 3018.79 (469.85)                                                   | 0.208   |
| Length (cm, mean (sd))                              |            | 48.35 (8.8)                           | 48.57 (11.4)                                                       | 0.568   |
| Head circumference (cm, mean (sd))                  |            | 33.83 (2.1)                           | 33.67 (2.2)                                                        | 0.038   |
| Cord blood anemia <sup>3</sup>                      |            | 344 (11.1)                            | 79 (8.1)                                                           | 0.026   |
| Cord blood parasitemia blood smear                  |            | 9 (0.3)                               | 1 (0.1)                                                            | 0.344   |
| Gestational age (weeks, median(IQR)) <sup>4,5</sup> |            | 39.2(38.4;40.4)                       | 40.00 (39.2;40.8)                                                  | 0.000   |
| Prematurity <sup>4,5,6</sup>                        |            | 119 (3.8)                             | 38 (3.9)                                                           | 0.602   |
| Low birth weight <sup>7</sup>                       |            | 323 (10.4)                            | 109 (11.2)                                                         | 0.439   |
| Congenital abnormalities <sup>8</sup>               |            | 42 (1.4)                              | 17 (1.8)                                                           | 0.304   |
| Reasons for not completing the study                |            |                                       |                                                                    |         |
| Deaths                                              |            |                                       | 166 (3.9)                                                          |         |
| Withdrawals                                         |            |                                       | 256 (6.0)                                                          |         |
| Migration                                           |            |                                       | 338 (8.0)                                                          |         |
| Lost to follow-up                                   |            |                                       | 378 (8.9)                                                          |         |

Chi-square test <sup>1</sup>Intermittent treatment of malaria in pregnancy <sup>2</sup>mefloquine <sup>3</sup>haemoglobin <12.5 g/dl

<sup>4</sup>available data from Benin, Gabon and Mozambique <sup>5</sup>calculated by Ballard score <sup>6</sup>gestational age<37

weeks <sup>7</sup>birth weight<2500g <sup>8</sup>reported as SAE at delivery and during the follow-up
